# Supplementary material for: The Evolutionary Success of the Marine Bacterium SAR11 Analyzed through a Metagenomic Perspective
Source: PubMed Central journal article supplement (PMC7542561; doi:10.1128/msystems.00605-20), 2020-10-06

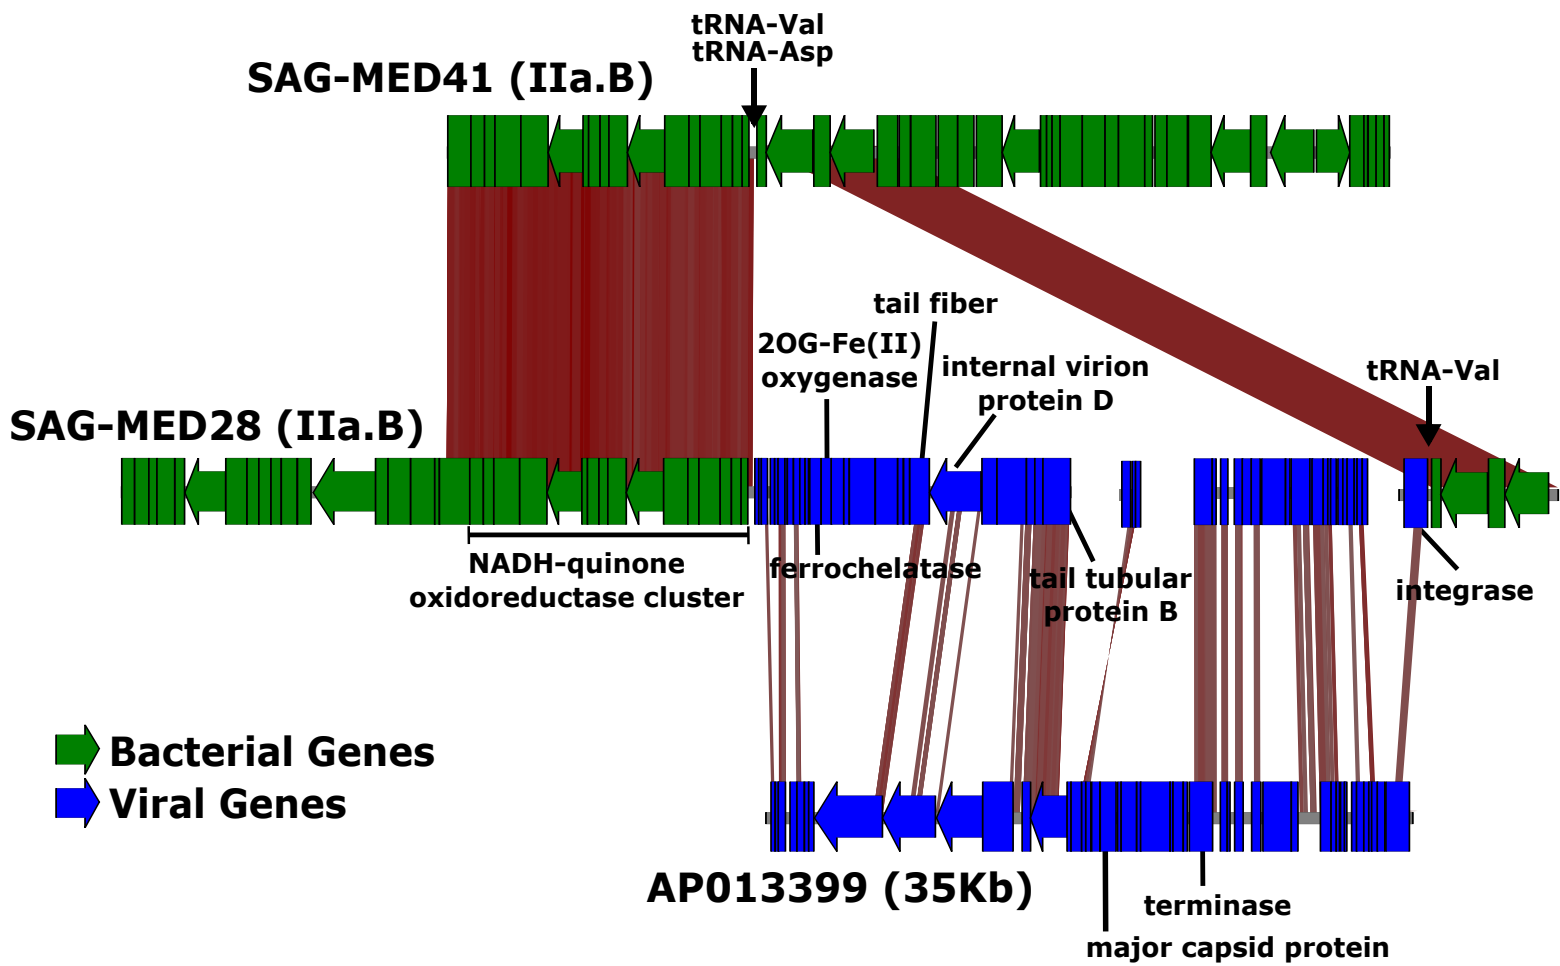

Supplement: mSystems.00605-20-sf003.pdf [file mSystems.00605-20-sf003.pdf]
