# Supplementary material for: The Evolutionary Success of the Marine Bacterium SAR11 Analyzed through a Metagenomic Perspective
Source: PubMed Central journal article supplement (PMC7542561; doi:10.1128/msystems.00605-20), 2020-10-06
Supplement: mSystems.00605-20-sf004.pdf [file mSystems.00605-20-sf004.pdf]

**Ia.3/I Genomospecies**

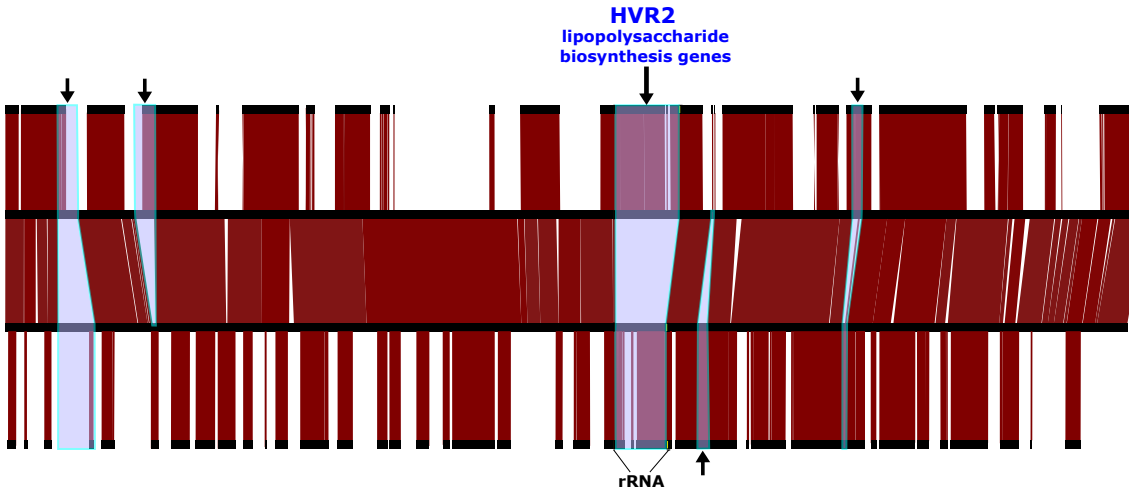

- SAG-MED25**  
Mediterranean Sea (2015)  
ANI 99.7% ; Cov 77.6%
- HTCC7211**  
Sargasso Sea (2006)  
ANI 94.6% ; Cov 88.5%
- HTCC7217**  
Sargasso Sea (2006)  
ANI 99.8% ; Cov 76.7%
- AG-414-C04**  
Sargasso Sea (2010)
