# Supplementary material for: The Evolutionary Success of the Marine Bacterium SAR11 Analyzed through a Metagenomic Perspective
Source: PubMed Central journal article supplement (PMC7542561; doi:10.1128/msystems.00605-20), 2020-10-06
Supplement: mSystems.00605-20-st001.pdf [file mSystems.00605-20-st001.pdf]

| SAR11 Genomospecies <sup>1</sup> | #of sequences (estimated coverage) | Polymorphic sites <sup>2</sup> (%) | pN          | pS           | pN/pS ratio |
|----------------------------------|------------------------------------|------------------------------------|-------------|--------------|-------------|
| Ia.3/V                           | 100K (10X)                         | 1.30                               | 0.01        | 0.27         | 0.08        |
|                                  | 250K (25X)                         | 4.10                               | 0.07        | 1.18         | 0.07        |
|                                  | 500K (50X)                         | 7.40                               | 0.19        | 2.80         | 0.07        |
|                                  | <b>1M (100X)</b>                   | <b>39.40</b>                       | <b>0.39</b> | <b>6.95</b>  | <b>0.06</b> |
| Ia.3/VII                         | 100K (10X)                         | 1.50                               | 0.02        | 0.32         | 0.11        |
|                                  | 250K (25X)                         | 3.20                               | 0.08        | 0.96         | 0.11        |
|                                  | 500K (50X)                         | 5.70                               | 0.20        | 2.30         | 0.10        |
|                                  | <b>1M (100X)</b>                   | <b>27.16</b>                       | <b>0.39</b> | <b>4.38</b>  | <b>0.09</b> |
| Ib.2/I                           | 100K (10X)                         | 1.50                               | 0.02        | 0.34         | 0.09        |
|                                  | 250K (25X)                         | 4.40                               | 0.10        | 1.30         | 0.08        |
|                                  | 500K (50X)                         | 7.50                               | 0.23        | 3.16         | 0.08        |
|                                  | <b>1M (100X)</b>                   | <b>45.35</b>                       | <b>0.87</b> | <b>14.61</b> | <b>0.07</b> |

<sup>1</sup>Values are calculated based on the average of the most complete genome in three different metagenomic samples

<sup>2</sup>Percentage of polymorphic sites per gene
