# Supplementary material for: The Evolutionary Success of the Marine Bacterium SAR11 Analyzed through a Metagenomic Perspective
Source: PubMed Central journal article supplement (PMC7542561; doi:10.1128/msystems.00605-20), 2020-10-06
Supplement: mSystems.00605-20-st002.pdf [file mSystems.00605-20-st002.pdf]

| Genome     | Genomosppecies | Metagenome                       | Biosample    | Bioproject  | Depth <sup>1</sup> | Isolation source     | Polymorphic sites <sup>2</sup> (%) | pN   | pS    | pN/pS ratio | Abundance (RPKG <sup>3</sup> ) | yju   | Recombination coverage |
|------------|----------------|----------------------------------|--------------|-------------|--------------------|----------------------|------------------------------------|------|-------|-------------|--------------------------------|-------|------------------------|
| AG-325-C10 | la.3/I         | ERR598978 (TARA_102)             | SAMEA2622173 | PRJEB1787   | SRF (5m)           | South Pacific Ocean  | 41.77                              | 0.56 | 9.69  | 0.06        | 24.04                          | 18.92 | 0.63                   |
| AG-325-C10 | la.3/I         | ERR315857 (TARA_007)             | SAMEA2591057 | PRJEB1788   | SRF (5m)           | Mediterranean Sea    | 27.12                              | 0.26 | 4.30  | 0.05        | 11.80                          | 15.16 | 0.66                   |
| AG-325-C10 | la.3/I         | SRR1539383 (MedDCM-JUL2012)      | SAMN02954012 | PRJNA257723 | DCM (75m)          | Mediterranean Sea    | 16.34                              | 0.10 | 1.59  | 0.06        | 8.52                           | 21.51 | 0.53                   |
| HTCC7211   | la.3/I         | ERR598978 (TARA_102)             | SAMEA2622173 | PRJEB1787   | SRF (5m)           | South Pacific Ocean  | 33.02                              | 0.31 | 5.55  | 0.06        | 18.92                          | 19.24 | 0.72                   |
| HTCC7211   | la.3/I         | ERR315857 (TARA_007)             | SAMEA2591057 | PRJEB1788   | SRF (5m)           | Mediterranean Sea    | 24.58                              | 0.21 | 3.16  | 0.06        | 24.44                          | 21.51 | 0.61                   |
| HTCC7211   | la.3/I         | SRR1539383 (MedDCM-JUL2012)      | SAMN02954012 | PRJNA257723 | DCM (75m)          | Mediterranean Sea    | 19.38                              | 0.14 | 1.84  | 0.07        | 14.75                          | 20.86 | 0.54                   |
| HTCC7214   | la.3/I         | ERR598978 (TARA_102)             | SAMEA2622173 | PRJEB1787   | SRF (5m)           | South Pacific Ocean  | 32.57                              | 0.31 | 5.41  | 0.06        | 23.13                          | 17.85 | 0.62                   |
| HTCC7214   | la.3/I         | ERR315857 (TARA_007)             | SAMEA2591057 | PRJEB1788   | SRF (5m)           | Mediterranean Sea    | 23.96                              | 0.21 | 3.21  | 0.06        | 19.06                          | 23.57 | 0.63                   |
| HTCC7214   | la.3/I         | SRR1539383 (MedDCM-JUL2012)      | SAMN02954012 | PRJNA257723 | DCM (75m)          | Mediterranean Sea    | 17.96                              | 0.12 | 1.70  | 0.06        | 11.66                          | 25.17 | 0.59                   |
| HTCC8051   | la.3/IV        | ERR598942 (TARA_133)             | SAMEA2623135 | PRJEB1787   | DCM (45m)          | North Pacific Ocean  | 33.10                              | 0.30 | 5.24  | 0.06        | 24.69                          | 11.44 | 0.65                   |
| HTCC8051   | la.3/IV        | ERR599052 (TARA_133)             | SAMEA2623116 | PRJEB1787   | SRF (5m)           | North Pacific Ocean  | 32.83                              | 0.31 | 5.08  | 0.07        | 26.22                          | 12.52 | 0.64                   |
| HTCC8051   | la.3/IV        | SRR1539383 (MedDCM-JUL2012)      | SAMN02954012 | PRJNA257723 | DCM (75m)          | Mediterranean Sea    | 32.88                              | 0.33 | 5.06  | 0.07        | 10.15                          | 18.20 | 0.65                   |
| HTCC9022   | la.3/IV        | ERR598942 (TARA_133)             | SAMEA2623135 | PRJEB1787   | DCM (45m)          | North Pacific Ocean  | 32.09                              | 0.29 | 5.67  | 0.06        | 24.55                          | 11.10 | 0.61                   |
| HTCC9022   | la.3/IV        | ERR599052 (TARA_133)             | SAMEA2623116 | PRJEB1787   | SRF (5m)           | North Pacific Ocean  | 31.99                              | 0.30 | 5.55  | 0.06        | 15.71                          | 13.13 | 0.62                   |
| HTCC9022   | la.3/IV        | SRR1539383 (MedDCM-JUL2012)      | SAMN02954012 | PRJNA257723 | DCM (75m)          | Mediterranean Sea    | 29.50                              | 0.25 | 4.52  | 0.06        | 25.17                          | 27.93 | 0.57                   |
| SAG-MED49  | la.3/IV        | ERR598942 (TARA_133)             | SAMEA2623135 | PRJEB1787   | DCM (45m)          | North Pacific Ocean  | 30.77                              | 0.36 | 5.10  | 0.07        | 22.61                          | 13.77 | 0.73                   |
| SAG-MED49  | la.3/IV        | ERR599052 (TARA_133)             | SAMEA2623116 | PRJEB1787   | SRF (5m)           | North Pacific Ocean  | 31.14                              | 0.36 | 4.96  | 0.07        | 36.59                          | 17.79 | 0.70                   |
| SAG-MED49  | la.3/IV        | SRR1539383 (MedDCM-JUL2012)      | SAMN02954012 | PRJNA257723 | DCM (75m)          | Mediterranean Sea    | 27.12                              | 0.29 | 3.63  | 0.08        | 14.15                          | 25.40 | 0.65                   |
| AA795-A20  | la.3/IV        | ERR599158 (TARA_038)             | SAMEA2620000 | PRJEB1787   | SRF (5m)           | Indian Ocean         | 44.35                              | 0.52 | 7.76  | 0.07        | 79.80                          | 20.64 | 0.80                   |
| AA795-A20  | la.3/IV        | ERR599029 (TARA_141)             | SAMEA2623446 | PRJEB1787   | SRF (5m)           | North Atlantic Ocean | 39.72                              | 0.37 | 7.72  | 0.06        | 52.53                          | 19.97 | 0.72                   |
| AA795-A20  | la.3/IV        | ERR598959 (TARA_034)             | SAMEA2619879 | PRJEB1787   | SRF (5m)           | Red Sea              | 41.44                              | 0.42 | 7.62  | 0.06        | 87.88                          | 16.88 | 0.76                   |
| AG-422-D23 | la.3/IV        | ERR599158 (TARA_038)             | SAMEA2620000 | PRJEB1787   | SRF (5m)           | Indian Ocean         | 40.28                              | 0.44 | 6.85  | 0.07        | 52.45                          | 20.46 | 0.78                   |
| AG-422-D23 | la.3/IV        | ERR598959 (TARA_036)             | SAMEA2619879 | PRJEB1787   | SRF (5m)           | Red Sea              | 37.17                              | 0.37 | 6.60  | 0.06        | 55.41                          | 18.04 | 0.76                   |
| AG-422-D23 | la.3/IV        | ERR599029 (TARA_141)             | SAMEA2623446 | PRJEB1787   | SRF (5m)           | North Atlantic Ocean | 35.16                              | 0.33 | 6.41  | 0.05        | 33.10                          | 26.56 | 0.71                   |
| HIMB083    | la.3/IV        | ERR599158 (TARA_038)             | SAMEA2620000 | PRJEB1787   | SRF (5m)           | Indian Ocean         | 41.97                              | 0.42 | 6.83  | 0.07        | 73.51                          | 21.50 | 0.79                   |
| HIMB083    | la.3/IV        | ERR598959 (TARA_034)             | SAMEA2619879 | PRJEB1787   | SRF (5m)           | Red Sea              | 38.31                              | 0.34 | 6.50  | 0.06        | 90.69                          | 20.87 | 0.73                   |
| HIMB083    | la.3/IV        | ERR599029 (TARA_141)             | SAMEA2623446 | PRJEB1787   | SRF (5m)           | North Atlantic Ocean | 36.16                              | 0.29 | 6.28  | 0.06        | 59.50                          | 24.12 | 0.72                   |
| AA797-119  | la.3/VI        | ERR599029 (TARA_141)             | SAMEA2619879 | PRJEB1787   | SRF (5m)           | North Atlantic Ocean | 34.33                              | 0.34 | 6.43  | 0.05        | 9.13                           | 32.13 | 0.71                   |
| AA797-119  | la.3/VI        | ERR598959 (TARA_137)             | SAMEA2623275 | PRJEB1787   | SRF (5m)           | North Pacific Ocean  | 35.04                              | 0.41 | 6.19  | 0.06        | 53.72                          | 22.65 | 0.73                   |
| AA797-119  | la.3/VI        | ERR598959 (TARA_036)             | SAMEA2619927 | PRJEB1787   | SRF (5m)           | Indian Ocean         | 33.02                              | 0.32 | 5.70  | 0.06        | 29.39                          | 22.26 | 0.71                   |
| AG-390-A02 | la.3/VI        | ERR598959 (TARA_036)             | SAMEA2619927 | PRJEB1787   | SRF (5m)           | Indian Ocean         | 36.82                              | 0.40 | 6.75  | 0.06        | 37.22                          | 18.59 | 0.74                   |
| AG-390-A02 | la.3/VI        | ERR598989 (TARA_137)             | SAMEA2623275 | PRJEB1787   | SRF (5m)           | North Pacific Ocean  | 38.13                              | 0.42 | 6.02  | 0.07        | 20.93                          | 25.58 | 0.80                   |
| AG-390-A02 | la.3/VI        | ERR599029 (TARA_141)             | SAMEA2619879 | PRJEB1787   | SRF (5m)           | North Atlantic Ocean | 29.35                              | 0.27 | 5.48  | 0.05        | 25.45                          | 21.89 | 0.70                   |
| AG-390-M19 | la.3/VI        | ERR598959 (TARA_036)             | SAMEA2619927 | PRJEB1787   | SRF (5m)           | Indian Ocean         | 36.62                              | 0.39 | 6.72  | 0.06        | 40.29                          | 25.71 | 0.74                   |
| AG-390-M19 | la.3/VI        | ERR598989 (TARA_137)             | SAMEA2623275 | PRJEB1787   | SRF (5m)           | North Pacific Ocean  | 39.32                              | 0.46 | 6.65  | 0.06        | 23.36                          | 32.72 | 0.75                   |
| AG-390-M19 | la.3/VI        | ERR599029 (TARA_141)             | SAMEA2619879 | PRJEB1787   | SRF (5m)           | North Atlantic Ocean | 31.73                              | 0.31 | 6.48  | 0.05        | 22.39                          | 23.00 | 0.72                   |
| AG-414-O11 | la.3/VIII      | SRR5007106 (Med-OCT2015-15m)     | SAMN05992379 | PRJNA352798 | SRF (15m)          | Mediterranean Sea    | 30.57                              | 0.44 | 5.75  | 0.08        | 357.15                         | 25.68 | 0.58                   |
| AG-414-O11 | la.3/VIII      | SRR5788287 (GEOTRACES GA02S0163) | SAMN07136358 | PRJNA385854 | SRF (10m)          | North Atlantic Ocean | 35.23                              | 0.57 | 5.29  | 0.11        | 367.99                         | 19.75 | 0.54                   |
| AG-414-O11 | la.3/VIII      | ERR315862 (TARA_030)             | SAMEA2591108 | PRJEB1787   | SRF (5m)           | Mediterranean Sea    | 18.27                              | 0.20 | 2.68  | 0.08        | 528.87                         | 22.61 | 0.63                   |
| AG-430-E20 | la.3/VIII      | SRR5007106 (Med-OCT2015-15m)     | SAMN05992379 | PRJNA352798 | SRF (15m)          | Mediterranean Sea    | 30.59                              | 0.43 | 5.59  | 0.09        | 333.36                         | 28.98 | 0.60                   |
| AG-430-E20 | la.3/VIII      | SRR5788287 (GEOTRACES GA02S0163) | SAMN07136358 | PRJNA385854 | SRF (10m)          | North Atlantic Ocean | 35.38                              | 0.59 | 5.21  | 0.11        | 348.76                         | 23.10 | 0.57                   |
| AG-430-E20 | la.3/VIII      | ERR315862 (TARA_030)             | SAMEA2591108 | PRJEB1787   | SRF (5m)           | Mediterranean Sea    | 18.21                              | 0.20 | 2.67  | 0.08        | 544.16                         | 18.69 | 1.00                   |
| SAG-MED22  | la.3/VIII      | SRR5007106 (Med-OCT2015-15m)     | SAMN05992379 | PRJNA352798 | SRF (15m)          | Mediterranean Sea    | 28.44                              | 0.37 | 5.16  | 0.08        | 133.33                         | 29.14 | 0.59                   |
| SAG-MED22  | la.3/VIII      | SRR5788287 (GEOTRACES GA02S0163) | SAMN07136358 | PRJNA385854 | SRF (10m)          | North Atlantic Ocean | 31.36                              | 0.52 | 4.66  | 0.10        | 102.58                         | 17.45 | 0.55                   |
| SAG-MED22  | la.3/VIII      | ERR315862 (TARA_030)             | SAMEA2591108 | PRJEB1787   | SRF (5m)           | Mediterranean Sea    | 16.37                              | 0.17 | 2.45  | 0.07        | 199.35                         | 12.32 | 0.99                   |
| AG-390-D18 | la.3/VIII      | Med-OCT2015-60m                  | SAMN05992382 | PRJNA352798 | DCM 60m            | Mediterranean Sea    | 39.00                              | 0.52 | 7.39  | 0.08        | 19.61                          | 34.00 | 0.67                   |
| AG-390-D18 | la.3/VIII      | ERR599078 (TARA_152)             | SAMEA2623886 | PRJEB1787   | SRF (5m)           | North Atlantic Ocean | 39.52                              | 0.45 | 6.37  | 0.07        | 33.23                          | 13.95 | 0.70                   |
| AG-390-D18 | la.3/VIII      | ERR599064 (TARA_093)             | SAMEA2621779 | PRJEB1787   | SRF (5m)           | South Pacific Ocean  | 30.27                              | 0.31 | 5.29  | 0.06        | 24.69                          | 24.31 | 0.69                   |
| AG-390-L03 | la.3/VIII      | Med-OCT2015-60m                  | SAMN05992382 | PRJNA352798 | DCM 60m            | Mediterranean Sea    | 39.67                              | 0.52 | 7.41  | 0.08        | 18.68                          | 28.94 | 0.63                   |
| AG-390-L03 | la.3/VIII      | ERR599078 (TARA_152)             | SAMEA2623886 | PRJEB1787   | SRF (5m)           | North Atlantic Ocean | 38.54                              | 0.41 | 6.03  | 0.07        | 30.30                          | 32.28 | 0.72                   |
| AG-390-L03 | la.3/VIII      | ERR599064 (TARA_093)             | SAMEA2621779 | PRJEB1787   | SRF (5m)           | South Pacific Ocean  | 31.72                              | 0.31 | 5.69  | 0.06        | 22.61                          | 13.70 | 0.69                   |
| SAG-MED50  | la.3/VIII      | SRR5007118 (Med-OCT2015-60m)     | SAMN05992382 | PRJNA352798 | DCM (60m)          | Mediterranean Sea    | 43.85                              | 0.67 | 6.68  | 0.08        | 31.77                          | 20.20 | 0.52                   |
| SAG-MED50  | la.3/VIII      | ERR599078 (TARA_152)             | SAMEA2623886 | PRJEB1787   | SRF (5m)           | North Atlantic Ocean | 40.00                              | 0.45 | 6.87  | 0.07        | 21.47                          | 19.98 | 0.73                   |
| SAG-MED50  | la.3/VIII      | ERR599064 (TARA_093)             | SAMEA2621779 | PRJEB1787   | SRF (5m)           | South Pacific Ocean  | 32.76                              | 0.33 | 6.00  | 0.06        | 24.55                          | 16.38 | 0.74                   |
| AG-426-M19 | lb.1/III       | ERR599030 (TARA_138)             | SAMEA2623350 | PRJEB1787   | SRF (5m)           | North Pacific Ocean  | 40.04                              | 0.50 | 10.83 | 0.06        | 43.55                          | 32.19 | 0.83                   |
| AG-426-M19 | lb.1/III       | ERR599019 (TARA_048)             | SAMEA2620404 | PRJEB1787   | SRF (5m)           | Indian Ocean         | 37.78                              | 0.52 | 9.44  | 0.06        | 62.90                          | 22.33 | 0.77                   |
| AG-426-M19 | lb.1/III       | ERR598959 (TARA_031)             | SAMEA2619802 | PRJEB1787   | SRF (5m)           | Red Sea              | 15.82                              | 0.11 | 2.36  | 0.05        | 26.39                          | 19.30 | 0.59                   |
| GOM-A1     | lb.1/III       | ERR599030 (TARA_138)             | SAMEA2623350 | PRJEB1787   | SRF (5m)           | North Pacific Ocean  | 39.19                              | 0.48 | 9.56  | 0.06        | 44.15                          | 24.80 | 0.79                   |
| GOM-A1     | lb.1/III       | ERR599019 (TARA_048)             | SAMEA2620404 | PRJEB1787   | SRF (5m)           | Indian Ocean         | 37.50                              | 0.49 | 8.68  | 0.07        | 65.66                          | 21.46 | 0.75                   |
| GOM-A1     | lb.1/III       | ERR598959 (TARA_031)             | SAMEA2619802 | PRJEB1787   | SRF (5m)           | Red Sea              | 15.88                              | 0.10 | 2.24  | 0.05        | 24.67                          | 14.60 | 0.68                   |
| GOM-A5     | lb.1/III       | ERR599030 (TARA_138)             | SAMEA2623350 | PRJEB1787   | SRF (5m)           | North Pacific Ocean  | 57.23                              | 1.18 | 21.72 | 0.06        | 39.86                          | 34.28 | 0.74                   |
| GOM-A5     | lb.1/III       | ERR599019 (TARA_048)             | SAMEA2620404 | PRJEB1787   | SRF (5m)           | Indian Ocean         | 39.22                              | 0.57 | 9.11  | 0.07        | 54.78                          | 12.98 | 0.75                   |
| GOM-A5     | lb.1/III       | ERR598959 (TARA_031)             | SAMEA2619802 | PRJEB1787   | SRF (5m)           | Red Sea              | 15.89                              | 0.10 | 2.07  | 0.05        | 20.86                          | 7.96  | 0.80                   |
| AG-325-E23 | lb.2/I         | ERR598967 (TARA_096)             | SAMEA2621859 | PRJEB1787   | SRF (5m)           | South Pacific Ocean  | 46.85                              | 0.91 | 14.58 | 0.08        | 21.92                          | 18.83 | 0.78                   |
| AG-325-E23 | lb.2/I         | ERR598993 (TARA_018)             | SAMEA2619667 | PRJEB1787   | SRF (5m)           | Mediterranean Sea    | 42.93                              | 0.74 | 12.79 | 0.07        | 30.25                          | 21.28 | 0.74                   |
| AG-325-E23 | lb.2/I         | ERR598955 (TARA_004)             | SAMEA2619376 | PRJEB1787   | SRF (5m)           | North Atlantic Ocean | 41.13                              | 0.69 | 12.54 | 0.07        | 23.42                          | 20.20 | 0.74                   |
| AG-359-O02 | lb.2/I         | ERR598955 (TARA_004)             | SAMEA2619376 | PRJEB1787   | SRF (5m)           | North Atlantic Ocean | 43.74                              | 0.79 | 14.48 | 0.07        | 17.89                          | 19.02 | 0.70                   |
| AG-359-O02 | lb.2/I         | ERR598967 (TARA_096)             | SAMEA2621859 | PRJEB1787   | SRF (5m)           | South Pacific Ocean  | 49.54                              | 0.88 | 14.40 | 0.08        | 24.93                          | 25.01 | 0.77                   |
| AG-359-O02 | lb.2/I         | ERR598993 (TARA_018)             | SAMEA2619667 | PRJEB1787   | SRF (5m)           | Mediterranean Sea    | 43.56                              | 0.82 | 13.98 | 0.07        | 23.90                          | 17.42 | 0.71                   |
| SAG-MED34  | lb.2/I         | ERR598967 (TARA_096)             | SAMEA2621859 | PRJEB1787   | SRF (5m)           | South Pacific Ocean  | 50.00                              | 1.14 | 17.70 | 0.08        | 19.84                          | 17.33 | 0.73                   |
| SAG-MED34  | lb.2/I         | ERR598993 (TARA_018)             | SAMEA2619667 | PRJEB1787   | SRF (5m)           | Mediterranean Sea    | 45.51                              | 0.94 | 16.51 | 0.07        | 35.41                          | 25.18 | 0.68                   |
| SAG-MED34  | lb.2/I         | ERR598955 (TARA_004)             | SAMEA2619376 | PRJEB1787   | SRF (5m)           | North Atlantic Ocean | 44.86                              | 0.89 | 14.47 | 0.07        | 34.77                          | 24.78 | 0.68                   |
| AA288-G21  | lc.1           | ERR599000 (TARA_076)             | SAMEA2621232 | PRJEB1787   | MES (800m)         | South Atlantic Ocean | 45.65                              | 1.52 | 9.61  | 0.17        | 12.51                          | 15.42 | 0.79                   |
| AA288-G21  | lc.1           | ERR598964 (TARA_149)             | SAMEA2623794 | PRJEB1787   | MES (740m)         | North Atlantic Ocean | 47.03                              | 1.43 | 8.99  | 0.16        | 12.31                          | 19.85 | 0.81                   |
| AA288-G21  | lc.1           | ERR599021 (TARA_064)             | SAMEA2620815 | PRJEB1787   | MES (1000m)        | Indian Ocean         | 23.76                              | 0.41 | 2.57  | 0.17        | 15.14                          | 16.73 | 0.78                   |
| AA288-N07  | lc.1           | ERR598964 (TARA_149)             | SAMEA2623794 | PRJEB1787   | MES (740m)         | North Atlantic Ocean | 29.05                              | 0.73 | 5.17  | 0.14        | 10.93                          | 13.22 | 0.76                   |
| AA288-N07  | lc.1           | ERR599000 (TARA_076)             | SAMEA2621232 | PRJEB1787   | MES (800m)         | South Atlantic Ocean | 26.82                              | 0.68 | 4.80  | 0.15        | 9.26                           | 8.58  | 0.51                   |
| AA288-N07  | lc.1           | ERR599021 (TARA_064)             | SAMEA2620815 | PRJEB1787   | MES (1000m)        | Indian Ocean         |                                    |      |       |             |                                |       |                        |
