# Supplementary material for: The Evolutionary Success of the Marine Bacterium SAR11 Analyzed through a Metagenomic Perspective
Source: PubMed Central journal article supplement (PMC7542561; doi:10.1128/msystems.00605-20), 2020-10-06
Supplement: mSystems.00605-20-st003.pdf [file mSystems.00605-20-st003.pdf]

| Genome                                  | Metagenome <sup>1</sup>     | Depth | Isolation source     | Polymorphic sites <sup>2</sup> (%) | pN   | pS   | pN/pS ratio | Abundance (RPKG <sup>3</sup> ) | γ/μ   | Recombination coverage |
|-----------------------------------------|-----------------------------|-------|----------------------|------------------------------------|------|------|-------------|--------------------------------|-------|------------------------|
| <i>Alteromonas macleodii</i> AD45       | SRR5788341 (Geotraces GA03) | MES   | North Atlantic Ocean | 13.72                              | 0.25 | 0.57 | 0.29        | 56.21                          | 4.15  | 0.43                   |
| <i>Alteromonas macleodii</i> AD45       | SRR5788169 (Geotraces GA03) | SRF   | North Atlantic Ocean | 8.59                               | 0.24 | 0.53 | 0.30        | 63.63                          | 4.09  | 0.44                   |
| <i>Alteromonas macleodii</i> AD45       | SRR5788344 (Geotraces GA03) | SRF   | North Atlantic Ocean | 3.09                               | 0.08 | 0.20 | 0.22        | 44.18                          | 3.47  | 0.44                   |
| <i>Erythrobacter citreus</i> LAMA 915   | SAMN10839296                | DCM   | Mediterranean Sea    | 4.14                               | 0.23 | 0.45 | 0.30        | 14.23                          | 4.51  | 0.35                   |
| <i>Erythrobacter citreus</i> LAMA 915   | ERR599112 (TARA_056)        | MES   | Indian Ocean         | 7.27                               | 0.14 | 0.26 | 0.39        | 9.02                           | 4.54  | 0.39                   |
| <i>Erythrobacter citreus</i> LAMA 915   | ERR598999 (TARA_122)        | MES   | South Pacific Ocean  | 1.61                               | 0.02 | 0.04 | 0.19        | 12.23                          | 5.30  | 0.39                   |
| <i>Ca. Nitrosopelagicus brevis</i> CN25 | SRR5788020 (Geotraces GA02) | MES   | South Atlantic Ocean | 33.63                              | 1.65 | 2.90 | 0.78        | 172.24                         | 17.12 | 0.58                   |
| <i>Ca. Nitrosopelagicus brevis</i> CN25 | SRR5787994 (Geotraces GA03) | MES   | North Atlantic Ocean | 34.70                              | 1.26 | 1.78 | 0.82        | 139.46                         | 17.17 | 0.58                   |
| <i>Ca. Nitrosopelagicus brevis</i> CN25 | SRR5788063 (Geotraces GA03) | MES   | North Atlantic Ocean | 21.37                              | 0.48 | 0.73 | 0.70        | 73.04                          | 13.26 | 0.53                   |
| MG-II Thalamoarchaea                    | SRR5788230 (Geotraces GA02) | MES   | North Atlantic Ocean | 22.36                              | 0.47 | 0.49 | 0.61        | 41.22                          | 17.03 | 0.34                   |
| MG-II Thalamoarchaea                    | SRR5788131 (Geotraces GA10) | SRF   | South Atlantic Ocean | 8.92                               | 0.13 | 0.26 | 0.19        | 29.84                          | 28.12 | 0.50                   |
| MG-II Thalamoarchaea                    | SRR5788284 (Geotraces GA02) | DCM   | North Atlantic Ocean | 5.71                               | 0.09 | 0.17 | 0.36        | 37.28                          | 15.22 | 0.33                   |
| <i>Prochlorococcus marinus</i> MED4     | SRR5788024 (Geotraces GA02) | DCM   | South Atlantic Ocean | 47.97                              | 1.83 | 2.42 | 0.82        | 203.15                         | 48.80 | 0.79                   |
| <i>Prochlorococcus marinus</i> MED4     | SRR5787990 (Geotraces GA02) | DCM   | South Atlantic Ocean | 42.79                              | 1.48 | 2.03 | 0.79        | 195.22                         | 61.11 | 0.80                   |
| <i>Prochlorococcus marinus</i> MED4     | SRR5788058 (Geotraces GP13) | MES   | South Pacific Ocean  | 44.62                              | 1.47 | 1.99 | 0.71        | 144.10                         | 56.86 | 0.81                   |
| <i>Synechococcus</i> sp. CC9902         | SRR5788434 (Geotraces GA02) | SRF   | North Atlantic Ocean | 33.13                              | 0.91 | 1.14 | 0.58        | 46.06                          | 11.11 | 0.36                   |
| <i>Synechococcus</i> sp. CC9902         | SRR5788234 (Geotraces GA02) | SRF   | North Atlantic Ocean | 12.80                              | 0.26 | 0.36 | 0.53        | 25.10                          | 8.92  | 0.39                   |
| <i>Synechococcus</i> sp. CC9902         | SRR5788109 (Geotraces GA02) | SRF   | North Atlantic Ocean | 5.26                               | 0.08 | 0.14 | 0.31        | 18.58                          | 6.52  | 0.36                   |

<sup>1</sup>SRF: surface; DCM: deep chlorophyll maximum; MES: mesopelagic.

<sup>2</sup>Percentage of polymorphic sites per gene.

<sup>3</sup>Reads per Kilobase of Genome and Gigabase of Metagenome.
