# Supplementary material for: The Evolutionary Success of the Marine Bacterium SAR11 Analyzed through a Metagenomic Perspective
Source: PubMed Central journal article supplement (PMC7542561; doi:10.1128/msystems.00605-20), 2020-10-06
Supplement: mSystems.00605-20-st004.pdf [file mSystems.00605-20-st004.pdf]

| Group                     | Genomospecies | Genome                                 | Genome Size (bp) | Completeness (%) | Contamination (%) | Isolation source     | Depth | Type    | Accession number | Biosample    | Bioproject  |
|---------------------------|---------------|----------------------------------------|------------------|------------------|-------------------|----------------------|-------|---------|------------------|--------------|-------------|
| SAR11                     | la.3/I        | AG-325-C10                             | 1,087,529        | 78.29            | 0                 | South Pacific Ocean  | 14m   | SAG     | GCA_902515085.1  | SAMEA6077249 | PRJEB33281  |
| SAR11                     | la.3/I        | HTCCZ711                               | 1,456,888        | 100              | 0.47              | Sargasso Sea, BATS   | 1m    | Isolate | GCA_000155895.1  | SAMN02436224 | PRJNA19339  |
| SAR11                     | la.3/I        | HTCCZ714                               | 1,375,060        | 99.05            | 0.47              | Sargasso Sea, BATS   | 1m    | Isolate | GCA_000701385.1  | SAMN02841172 | PRJNA219140 |
| SAR11                     | la.3/IV       | HTCC8051                               | 1,395,018        | 99.76            | 0                 | Oregon Coast         | 5m    | Isolate | GCA_000472605.1  | SAMN02440710 | PRJNA182738 |
| SAR11                     | la.3/IV       | HTCC9022                               | 1,360,964        | 100              | 0                 | --                   | --    | Isolate | GCA_000472565.1  | SAMN02440710 | PRJNA182740 |
| SAR11                     | la.3/IV       | SAG-MED49                              | 1,167,552        | 85.47            | 0.95              | Mediterranean Sea    | 5m    | SAG     | --               | SAMN15685207 | PRJNA473343 |
| SAR11                     | la.3/V        | AAA795-A20                             | 1,140,609        | 86.82            | 0                 | Red Sea              | 1m    | SAG     | GCA_001179845.1  | SAMEA3368553 | PRJEB9287   |
| SAR11                     | la.3/V        | AG-422-D23                             | 1,279,565        | 90.28            | 0                 | North Atlantic Ocean | 57.7m | SAG     | GCA_902571845.1  | SAMEA6076235 | PRJEB33281  |
| SAR11                     | la.3/V        | HIMB083                                | 1,395,997        | 99.53            | 0                 | --                   | --    | Isolate | GCA_000504225.1  | SAMN02597166 | PRJNA74601  |
| SAR11                     | la.3/VI       | AAA797-I19                             | 1,016,895        | 67.04            | 0.47              | Red Sea              | 1m    | SAG     | GCA_001180225.1  | SAMN02597166 | PRJEB9287   |
| SAR11                     | la.3/VI       | AG-390-A02                             | 1,079,061        | 73.58            | 0                 | North Atlantic Ocean | 8m    | SAG     | GCA_902554465.1  | SAMEA6075582 | PRJEB33281  |
| SAR11                     | la.3/VI       | AG-390-M19                             | 873,216          | 59.18            | 0                 | North Atlantic Ocean | 8m    | SAG     | GCA_902558955.1  | SAMEA6075806 | PRJEB33281  |
| SAR11                     | la.3/VII      | AG-414-O11                             | 1,212,678        | 90.05            | 0                 | North Atlantic Ocean | 119m  | SAG     | GCA_902570235.1  | SAMEA6076036 | PRJEB33281  |
| SAR11                     | la.3/VII      | AG-430-E20                             | 1,183,991        | 90.6             | 0                 | North Atlantic Ocean | 89.9m | SAG     | GCA_902580005.1  | SAMEA6079829 | PRJEB33281  |
| SAR11                     | la.3/VII      | SAG-MED22                              | 1,191,160        | 98.56            | 0.52              | Mediterranean Sea    | 5m    | SAG     | --               | SAMN15685184 | PRJNA473343 |
| SAR11                     | la.3/VIII     | AG-390-D18                             | 1,218,852        | 86.05            | 0                 | North Atlantic Ocean | 8m    | SAG     | GCA_902555825.1  | SAMEA6075651 | PRJEB33281  |
| SAR11                     | la.3/VIII     | AG-390-L03                             | 1,352,095        | 94.31            | 0                 | North Atlantic Ocean | 8m    | SAG     | GCA_902558255.1  | SAMEA6075772 | PRJEB33281  |
| SAR11                     | la.3/III      | SAG-MED50                              | 1,257,069        | 89.65            | 0.24              | Mediterranean Sea    | 5m    | SAG     | --               | SAMN15685208 | PRJNA473343 |
| SAR11                     | lb.1/III      | AG-426-M19                             | 1,256,227        | 84.59            | 0                 | North Atlantic Ocean | 90.8m | SAG     | GCA_902578885.1  | SAMEA6079697 | PRJEB33281  |
| SAR11                     | lb.1/III      | GOM-A1                                 | 1,330,051        | 93.98            | 1.2               | Gulf of Mexico       | 1m    | SAG     | GCA_001704065.1  | SAMN03944292 | PRJNA291283 |
| SAR11                     | lb.1/III      | GOM-A5                                 | 655,485          | 52.42            | 0.07              | Gulf of Mexico       | 1m    | SAG     | GCA_001704055.1  | SAMN03944296 | PRJNA291283 |
| SAR11                     | lb.2/I        | AG-325-E23                             | 1,159,533        | 67.92            | 0                 | South Pacific Ocean  | 14m   | SAG     | GCA_902515595.1  | SAMEA6077300 | PRJEB33281  |
| SAR11                     | lb.2/I        | AG-359-O02                             | 1,098,312        | 89.63            | 0                 | North Atlantic Ocean | 10m   | SAG     | GCA_902543155.1  | SAMEA6069045 | PRJEB33281  |
| SAR11                     | lb.2/I        | SAG-MED34                              | 796,940          | 62.7             | 0                 | Mediterranean Sea    | 5m    | SAG     | --               | SAMN15685195 | PRJNA473343 |
| SAR11                     | lc.1          | AAA288-G21                             | 909,786          | 55.62            | 0.11              | North Pacific Ocean  | 770m  | SAG     | GCA_000513075.1  | SAMN02597281 | PRJNA232476 |
| SAR11                     | lc.1          | AAA288-N07                             | 954,664          | 71.93            | 1.2               | North Pacific Ocean  | 770m  | SAG     | GCA_000513055.1  | SAMN02597280 | PRJNA232477 |
| SAR11                     | lc.1          | AG-464-P07                             | 1,138,562        | 77.71            | 0                 | South Pacific Ocean  | 203m  | SAG     | GCA_902608355.1  | SAMEA6079275 | PRJEB33281  |
| SAR11                     | lllb          | AAA028-C07                             | 846,566          | 74.12            | 0.11              | Lake Mendota         | --    | SAG     | GCA_000419465.1  | SAMN02441251 | PRJNA76629  |
| Reference Marine Microbes | --            | <i>A. macleodii</i> AD45               | 4,674,885        | 100              | 0                 | Mediterranean Sea    | 5m    | Isolate | GCA_000300175.1  | SAMN02604120 | PRJNA65405  |
| Reference Marine Microbes | --            | <i>E. citreus</i> LAMA-915             | 3,094,736        | 100              | 0                 | South Atlantic Ocean | 3600m | Isolate | GCA_001235865.1  | SAMN03344099 | PRJNA193448 |
| Reference Marine Microbes | --            | <i>Synechococcus</i> sp. CC9902        | 2,234,828        | 100              | 0                 | Pacific Ocean        | 5m    | Isolate | GCA_000012505.1  | SAMN02598312 | PRJNA13655  |
| Reference Marine Microbes | --            | <i>P. marinus</i> MED4                 | 1,657,990        | 100              | 0                 | Mediterranean Sea    | 5m    | Isolate | GCA_000011465.1  | SAMEA3138209 | PRJNA2113   |
| Reference Marine Microbes | --            | <i>Ca. Nitrosoplagicus brevis</i> CN25 | 1,232,128        | 100              | 0                 | North Pacific Ocean  | 25m   | Isolate | GCA_000812185.1  | SAMN03273964 | PRJNA22314  |
| Reference Marine Microbes | --            | MG-II Thalassarchaeota                 | 2,870,682        | 88.3             | 2.1               | Mediterranean Sea    | 50m   | MAG     | --               | SAMN02954236 | PRJNA257723 |
